# Supplementary material
Source: Elsevier journal article supplement (https://www.sciencedirect.com/science/article/pii/S2174204919301540)

**Supplemental Figure 1.** Twelve-lead electrocardiogram depicting a slow 1:1 atrioventricular conduction atrial flutter with right bundle branch block.


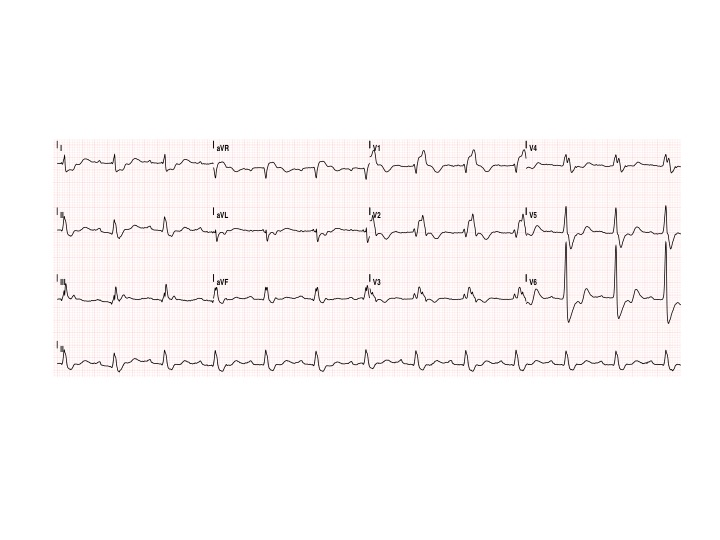

Supplement: mmc6 [file S2174204919301540:mmc6.docx]
