# Supplementary material
Source: Elsevier journal article supplement (https://www.sciencedirect.com/science/article/pii/S2174204919301540)

**Supplemental Figure 3.** Twelve-lead electrocardiogram: Sinus rhythm following the ablation procedure.


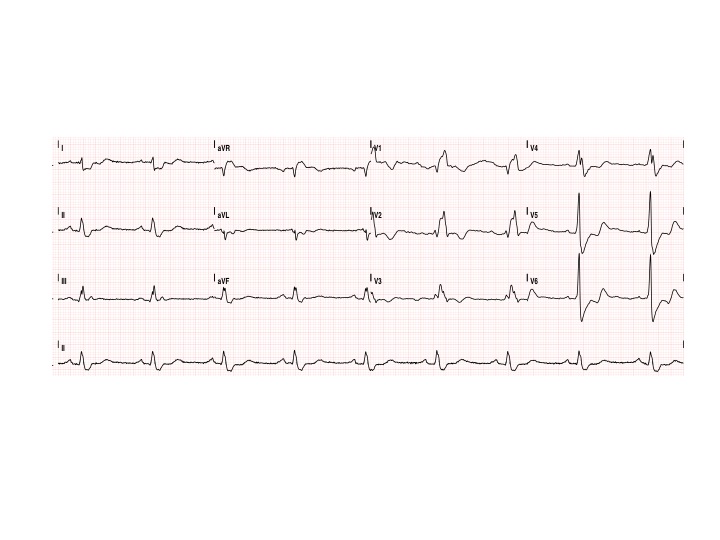

Supplement: mmc8 [file S2174204919301540:mmc8.docx]
